# Supplementary material
Source: Springer Nature journal article supplement (https://www.springermedizin.de/resource/supplementary/12889_2011_3703_MOESM1_ESM.pdf/9489820)
Supplement: MOESM1 [file 9489820]

Patients with tuberculosis-related ICD-9 codes, 2005-2007 (n=209,095)

Patients with tuberculosis-related ICD-9 codes in previous year (n=64,377)

Patients newly assigned with tuberculosis-related ICD-9 codes (n=144,718)  
52,171 in the year 2005  
50,973 in the year 2006  
41,574 in the year 2007

Patients not prescribed with any anti-tuberculosis drug (n=84,361)  
30,021 in the year 2005  
30,948 in the year 2006  
23,392 in the year 2007

Patients prescribed with only one anti-tuberculosis drug (n=2,952)  
1,175 in the year 2005  
968 in the year 2006  
809 in the year 2007

Patients prescribed with 2 or more anti-tuberculosis drugs, 2005-2007 (n=57,405)

In the year 2005  
n=20,975

In the year 2006  
n=19,057

In the year 2007  
n=17,373

Notified  
n=20,034  
(95.5%)

Not notified  
n=941  
(4.5%)

Notified  
n=18,438  
(96.8%)

Not notified  
n=619  
(3.2%)

Notified  
n=16,819  
(96.8%)

Not notified  
n=554  
(3.2%)
